# Supplementary material for: Genomic Heterogeneity as a Barrier to Precision Medicine in Gastroesophageal Adenocarcinoma
Source: Oxford University Press journal article supplement (doi:10.1158/2159-8290.cd-17-0395), 2017-10-04
Supplement: 21598290cd170395-sup-181835_2_supp_4261076_8w4838.xlsx [file 21598290cd170395-sup-181835_2_supp_4261076_8w4838.xlsx]

## Sheet: Suppl Table 1 (Cohort 1)
Supplementary Table 1. Tumor and sequencing information for Cohort 1, paired primary and metastatic gastric adenocarcinoma samples
Case ID	Tumor type	Tissue of origin	Mutation rate	Purity	Poidy	Genome doublings
C1-1	Metastasis	liver	2.50268	0.5	2.84	0
	Primary	stomach	2.66953	0.37	1.87	0
C1-2	Metastasis	ascites	4.3936	0.53	5.63	2
	Primary	stomach	3.25349	0.18	2.14	0
C1-3	Metastasis	ascites	1.89092	0.19	2.07	0
	Primary	stomach	2.80857	0.21	2.05	0
C1-4	Metastasis	liver	4.78291	0.39	4.48	1
	Primary	stomach	4.28237	0.39	4.4	1
C1-5	Metastasis	liver	3.39253	0.42	3.53	1
	Primary	stomach	3.69841	0.47	3.61	1
C1-6	Metastasis	liver	6.17329	0.63	2.66	1
	Primary	stomach	7.53586	0.64	2.41	1
C1-7	Metastasis	LN	2.83638	0.22	2.18	0
	Primary	stomach	3.03103	0.23	2.04	0
C1-8	Metastasis	liver	5.06098	0.85	2.55	0
	Primary	stomach	3.55937	0.26	2.01	0
C1-9	Metastasis	mesenteric	1.72407	0.43	1.65	0
	Primary	stomach	1.05669	0.19	1.78	0
C1-10	Metastasis	liver	3.50376	0.3	1.79	0
	Primary	stomach	3.6428	0.35	1.93	0
C1-11	Metastasis 1	bone	1.36257	0.23	1.86	0
	Metastasis 2	ascites	1.33477	0.36	1.79	0
	Primary 1	stomach	1.22353	0.22	1.83	0
	Primary 2	stomach	1.66846	0.45	1.83	0

## Sheet: Suppl Table 2
Supplementary Table 2. 243-gene targeted panel used for sequencing of Cohort 2 samples
Genes	David annotation 2
AKT1	v-akt murine thymoma viral oncogene homolog 1
AKT2	v-akt murine thymoma viral oncogene homolog 2
AKT3	v-akt murine thymoma viral oncogene homolog 3 (protein kinase B, gamma)
ALK	anaplastic lymphoma receptor tyrosine kinase
ALPK2	alpha-kinase 2
APC	adenomatous polyposis coli
AR	androgen receptor
ARAF	v-raf murine sarcoma 3611 viral oncogene homolog
ARHGAP26	Rho GTPase activating protein 26
ARHGAP6	Rho GTPase activating protein 6
ARID1A	AT rich interactive domain 1A (SWI-like)
ARID1B	AT rich interactive domain 1B (SWI1-like)
ARID2	AT rich interactive domain 2 (ARID, RFX-like)
ATM	similar to Serine-protein kinase ATM (Ataxia telangiectasia mutated) (A-T, mutated); ataxia telangiectasia mutated
AXL	AXL receptor tyrosine kinase
B2M	beta-2-microglobulin
BAK1	BCL2-antagonist/killer 1; BCL2-like 7 pseudogene 1
BCL2	B-cell CLL/lymphoma 2
BCL2A1	BCL2-related protein A1
BCL2L1	BCL2-like 1
BCL2L12	BCL2-like 12 (proline rich)
BCL2L2	BCL2-like 2
BCL6	B-cell CLL/lymphoma 6
BCL9	B-cell CLL/lymphoma 9
BCOR	BCL6 co-repressor
BCORL1	BCL6 co-repressor-like 1
BIRC5	baculoviral IAP repeat-containing 5
BLM	Bloom syndrome, RecQ helicase-like
BRAF	v-raf murine sarcoma viral oncogene homolog B1
BRCA1	breast cancer 1, early onset
BRCA2	breast cancer 2, early onset
BRD4	bromodomain containing 4
CA9	carbonic anhydrase IX
CACNA2D3	calcium channel, voltage-dependent, alpha 2/delta subunit 3
CASP3	caspase 3, apoptosis-related cysteine peptidase
CASZ1	castor zinc finger 1
CCND1	cyclin D1
CCND2	cyclin D2
CCND3	cyclin D3
CCNE1	cyclin E1
CD274	CD274 molecule
CD44	CD44 molecule (Indian blood group)
CDH1	cadherin 1, type 1, E-cadherin (epithelial)
CDK1	cell division cycle 2, G1 to S and G2 to M
CDK12	Cdc2-related kinase, arginine/serine-rich
CDK2	cyclin-dependent kinase 2
CDK4	cyclin-dependent kinase 4
CDK5	cyclin-dependent kinase 5
CDK6	cyclin-dependent kinase 6
CDK8	cyclin-dependent kinase 8
CDK9	cyclin-dependent kinase 9
CDKN1A	cyclin-dependent kinase inhibitor 1A (p21, Cip1)
CDKN1B	cyclin-dependent kinase inhibitor 1B (p27, Kip1)
CDKN1C	cyclin-dependent kinase inhibitor 1C (p57, Kip2)
CDKN2A	cyclin-dependent kinase inhibitor 2A (melanoma, p16, inhibits CDK4)
CDKN2B	cyclin-dependent kinase inhibitor 2B (p15, inhibits CDK4)
CDKN2C	cyclin-dependent kinase inhibitor 2C (p18, inhibits CDK4)
CHL1	cell adhesion molecule with homology to L1CAM (close homolog of L1)
CHRD	chordin
CIC	capicua homolog (Drosophila)
CLDN18	claudin 18
CRIP1	cysteine-rich protein 1 (intestinal)
CRKL	v-crk sarcoma virus CT10 oncogene homolog (avian)-like
CSMD1	CUB and Sushi multiple domains 1
CTNNA1	catenin (cadherin-associated protein), alpha 1, 102kDa
CTNNA3	catenin (cadherin-associated protein), alpha 3
CTNNB1	catenin (cadherin-associated protein), beta 1, 88kDa
CTSB	cathepsin B
CXCL10	chemokine (C-X-C motif) ligand 10
DOCK2	dedicator of cytokinesis 2
E2F1	E2F transcription factor 1
E2F3	E2F transcription factor 3
EGFR	epidermal growth factor receptor (erythroblastic leukemia viral (v-erb-b) oncogene homolog, avian)
ELF3	E74-like factor 3 (ets domain transcription factor, epithelial-specific )
ELMO1	engulfment and cell motility 1
EP300	E1A binding protein p300
EPHB3	EPH receptor B3
EPHB6	EPH receptor B6
ERBB2	v-erb-b2 erythroblastic leukemia viral oncogene homolog 2, neuro/glioblastoma derived oncogene homolog (avian)
ERBB2IP	erbb2 interacting protein
ERBB3	v-erb-b2 erythroblastic leukemia viral oncogene homolog 3 (avian)
ERBB4	v-erb-a erythroblastic leukemia viral oncogene homolog 4 (avian)
ETV4	ets variant 4
EYA4	eyes absent homolog 4 (Drosophila)
FAM190A	KIAA1680 protein
FAT1	#N/A
FAT2	FAT tumor suppressor homolog 2 (Drosophila)
FAT3	FAT tumor suppressor homolog 3 (Drosophila)
FAT4	FAT tumor suppressor homolog 4 (Drosophila)
FBXW7	F-box and WD repeat domain containing 7
FGF19	fibroblast growth factor 19
FGF3	fibroblast growth factor 3 (murine mammary tumor virus integration site (v-int-2) oncogene homolog)
FGF4	fibroblast growth factor 4
FGFR1	fibroblast growth factor receptor 1
FGFR2	fibroblast growth factor receptor 2
FGFR3	fibroblast growth factor receptor 3
FGFR4	fibroblast growth factor receptor 4
FHIT	fragile histidine triad gene
FRS2	fibroblast growth factor receptor substrate 2
GAB1	GRB2-associated binding protein 1
GAB2	GRB2-associated binding protein 2
GATA4	GATA binding protein 4
GATA6	GATA binding protein 6
GLI3	GLI family zinc finger 3
GLIPR1	GLI pathogenesis-related 1
GNAS	GNAS complex locus
HES1	hairy and enhancer of split 1, (Drosophila)
HGF	hepatocyte growth factor (hepapoietin A; scatter factor)
HLA-A	major histocompatibility complex, class I, A
HLA-B	major histocompatibility complex, class I, C; major histocompatibility complex, class I, B
ID1	inhibitor of DNA binding 1, dominant negative helix-loop-helix protein
IDH1	isocitrate dehydrogenase 1 (NADP+), soluble
IDH2	isocitrate dehydrogenase 2 (NADP+), mitochondrial
IGF1R	insulin-like growth factor 1 receptor
IGF2	insulin-like growth factor 2 (somatomedin A); insulin; INS-IGF2 readthrough transcript
IGF2BP3	insulin-like growth factor 2 mRNA binding protein 3
IGF2R	insulin-like growth factor 2 receptor
IL8	interleukin 8
ING5	inhibitor of growth family, member 5
IRF2	interferon regulatory factor 2
JAK2	Janus kinase 2
KDM6A	#N/A
KEAP1	kelch-like ECH-associated protein 1
KIF13A	kinesin family member 13A
KIT	similar to Mast/stem cell growth factor receptor precursor (SCFR) (Proto-oncogene tyrosine-protein kinase Kit) (c-kit) (CD117 antigen); v-kit Hardy-Zuckerman 4 feline sarcoma viral oncogene homolog
KLF12	Kruppel-like factor 12
KLF5	Kruppel-like factor 5 (intestinal)
KMT2D	Lysine (K)-Specific Methyltransferase 2D
KRAS	v-Ki-ras2 Kirsten rat sarcoma viral oncogene homolog
LARP4B	La ribonucleoprotein domain family, member 4B
LRP1B	low density lipoprotein-related protein 1B (deleted in tumors)
LRP6	low density lipoprotein receptor-related protein 6
MACF1	microtubule-actin crosslinking factor 1
MACROD2	MACRO domain containing 2
MAGI3	membrane associated guanylate kinase, WW and PDZ domain containing 3
MAP2K1	mitogen-activated protein kinase kinase 1
MAP2K2	mitogen-activated protein kinase kinase 2 pseudogene; mitogen-activated protein kinase kinase 2
MAP2K2	mitogen-activated protein kinase kinase 2 pseudogene; mitogen-activated protein kinase kinase 2
MAP2K4	mitogen-activated protein kinase kinase 4
MAP3K1	mitogen-activated protein kinase kinase kinase 1
MAP3K5	mitogen-activated protein kinase kinase kinase 5
MAP3K7	mitogen-activated protein kinase kinase kinase 7
MAP3K8	mitogen-activated protein kinase kinase kinase 8
MAP3K9	mitogen-activated protein kinase kinase kinase 9
MAPK1	mitogen-activated protein kinase 1
MAPK3	hypothetical LOC100271831; mitogen-activated protein kinase 3
MCL1	myeloid cell leukemia sequence 1 (BCL2-related)
MDM2	Mdm2 p53 binding protein homolog (mouse)
MECOM	ecotropic viral integration site 1
MET	met proto-oncogene (hepatocyte growth factor receptor)
MLL3	myeloid/lymphoid or mixed-lineage leukemia 3
MSH2	mutS homolog 2, colon cancer, nonpolyposis type 1 (E. coli)
MSH6	mutS homolog 6 (E. coli)
MTOR	mechanistic target of rapamycin (serine/threonine kinase)
MUTYH	mutY homolog (E. coli)
MYB	v-myb myeloblastosis viral oncogene homolog (avian)
MYC	v-myc myelocytomatosis viral oncogene homolog (avian)
MYD88	myeloid differentiation primary response gene (88)
NEGR1	neuronal growth regulator 1
NEIL2	nei like 2 (E. coli)
NF1	neurofibromin 1
NFE2L2	nuclear factor (erythroid-derived 2)-like 2
NKX2-1	NK2 homeobox 1
NOTCH1	Notch homolog 1, translocation-associated (Drosophila)
NOTCH2	Notch homolog 2 (Drosophila)
NOTCH3	Notch homolog 3 (Drosophila)
NOTCH4	Notch homolog 4 (Drosophila)
NR2F2	nuclear receptor subfamily 2, group F, member 2
NRAS	neuroblastoma RAS viral (v-ras) oncogene homolog
PAK1	p21 protein (Cdc42/Rac)-activated kinase 1
PALB2	partner and localizer of BRCA2
PARD3B	par-3 partitioning defective 3 homolog B (C. elegans)
PARK2	Parkinson disease (autosomal recessive, juvenile) 2, parkin
PAX9	paired box 9
PBRM1	polybromo 1
PCGF6	polycomb group ring finger 6
PDCD1LG2	programmed cell death 1 ligand 2
PDE4D	phosphodiesterase 4D, cAMP-specific (phosphodiesterase E3 dunce homolog, Drosophila)
PDGFRA	platelet-derived growth factor receptor, alpha polypeptide
PDGFRB	platelet-derived growth factor receptor, beta polypeptide
PGM5	phosphoglucomutase 5
PHLDA1	pleckstrin homology-like domain, family A, member 1
PIK3CA	phosphoinositide-3-kinase, catalytic, alpha polypeptide
PIK3CG	phosphoinositide-3-kinase, catalytic, gamma polypeptide
PIK3R1	phosphoinositide-3-kinase, regulatory subunit 1 (alpha)
PLK2	polo-like kinase 2 (Drosophila)
POLB	polymerase (DNA directed), beta
POU5F1B	POU class 5 homeobox 1B
PREX2	phosphatidylinositol-3,4,5-trisphosphate-dependent Rac exchange factor 2
PRKCi	Protein Kinase C, Iota
PTCH1	patched homolog 1 (Drosophila)
PTCH2	patched homolog 2 (Drosophila)
PTEN	phosphatase and tensin homolog; phosphatase and tensin homolog pseudogene 1
PTPN23	protein tyrosine phosphatase, non-receptor type 23
PTPRD	protein tyrosine phosphatase, receptor type, D
RASA1	RAS p21 protein activator (GTPase activating protein) 1
RASSF7	Ras association (RalGDS/AF-6) domain family (N-terminal) member 7
RB1	retinoblastoma 1
RBPJ	recombination signal binding protein for immunoglobulin kappa J region
RhoA	ras homolog gene family, member A
RICTOR	RPTOR independent companion of MTOR, complex 2
RNF43	ring finger protein 43
RPTOR	regulatory associated protein of MTOR, complex 1
RUNX1	runt-related transcription factor 1
RUNX1T1	runt-related transcription factor 1; translocated to, 1 (cyclin D-related)
RUNX3	runt-related transcription factor 3
SFRP4	secreted frizzled-related protein 4
SMAD2	SMAD family member 2
SMAD3	SMAD family member 3
SMAD4	SMAD family member 4
SMARCA4	SWI/SNF related, matrix associated, actin dependent regulator of chromatin, subfamily a, member 4
SMARCA5	SWI/SNF related, matrix associated, actin dependent regulator of chromatin, subfamily a, member 5
SMO	smoothened homolog (Drosophila)
SMURF1	SMAD specific E3 ubiquitin protein ligase 1
SOHLH2	spermatogenesis and oogenesis specific basic helix-loop-helix 2
SOX2	SRY (sex determining region Y)-box 2
SOX9	SRY (sex determining region Y)-box 9
SRC	v-src sarcoma (Schmidt-Ruppin A-2) viral oncogene homolog (avian)
STAT3	signal transducer and activator of transcription 3 (acute-phase response factor)
STAT6	signal transducer and activator of transcription 6, interleukin-4 induced
STK11	serine/threonine kinase 11
SYNE1	spectrin repeat containing, nuclear envelope 1
TCF7L1	transcription factor 7-like 1 (T-cell specific, HMG-box)
TCF7L2	transcription factor 7-like 2 (T-cell specific, HMG-box)
TERC	telomerase RNA component
TERT	telomerase reverse transcriptase
TGFBR2	transforming growth factor, beta receptor II (70/80kDa)
TLN1	talin 1
TLR4	toll-like receptor 4
TP53	tumor protein p53
TP63	tumor protein p63
TP73	tumor protein p73
TRAF2	TNF receptor-associated factor 2
TSC1	tuberous sclerosis 1
TSC2	tuberous sclerosis 2
USP9X	ubiquitin specific peptidase 9, X-linked
VEGFA	vascular endothelial growth factor A
VPS13A	vacuolar protein sorting 13 homolog A (S. cerevisiae)
WT1	Wilms tumor 1
WWOX	WW domain containing oxidoreductase
YAP1	Yes-associated protein 1, 65kDa
ZNF217	zinc finger protein 217
ZNF750	zinc finger protein 750

## Sheet: Suppl Table 3 (Cohort 1)
Supplementary Table 3: Wild type and mutant read counts for paired primary and metastatic samples in cohort 1.
Patient	Locus	Position	Variant Classification	Protein Change	Ref Allele	Mut Allele	Primary ref count	Primary alt count	Metastasis ref count	Metastasis alt count
C1-1	FAT3	92534306	Silent	p.T2709T	C	G	515	63	489	0
C1-1	PDGFRA	55139810	Missense_Mutation	p.A491T	G	A	381	0	238	48
C1-1	PIK3CA	178952085	Missense_Mutation	p.H1047R	A	G	356	11	271	0
C1-2	LRP1B	141747226	Splice_Site	p.F882_splice	A	C	264	15	182	0
C1-2	ZNF217	52199323	Missense_Mutation	p.L15V	A	C	674	21	988	0
C1-3	CHL1	386372	Frame_Shift_Ins	p.L260fs	NA	NA	NA	insertion in 6%	NA	Absent
C1-3	LRP1B	141283526	Missense_Mutation	p.V2638G	A	C	336	0	281	7
C1-4	ERBB4	212587179	Missense_Mutation	p.Q274H	T	G	349	0	265	14
C1-4	FAT3	92087334	Missense_Mutation	p.T686P	A	C	464	52	314	0
C1-5	SYNE1	152771839	Missense_Mutation	p.K1106E	T	C	475	0	357	23
C1-6	BRCA1	41223138	Missense_Mutation	p.S1598C	G	C	330	20	270	0
C1-6	FAT3	92616432	Silent	p.S4270S	G	A	135	40	107	1
C1-6	MAGI3	114189243	Missense_Mutation	p.K737E	A	G	275	17	198	0
C1-6	NEGR1	72748063	Missense_Mutation	p.D39N	C	T	146	55	158	0
C1-6	NR2F2	96877425	Missense_Mutation	p.A188V	C	T	235	98	225	0
C1-6	RICTOR	38945697	Missense_Mutation	p.T1510I	G	A	284	0	445	57
C1-6	SYNE1	152793497	Missense_Mutation	p.R468G	G	C	295	15	240	0
C1-6	TLR4	120475898	Missense_Mutation	p.L498V	T	G	967	12	298	0
C1-8	ELMO1	37382281	Missense_Mutation	p.A5V	G	A	217	7	192	0
C1-8	LRP6	12288152	Silent	p.C1230C	G	A	287	0	252	0
C1-10	IGF2R	160480109	Missense_Mutation	p.K1024E	A	G	227	6	183	0
C1-10	KIF13A	17826166	Splice_Site	p.R540_splice	C	T	366	0	201	84

## Sheet: Suppl Table 4 (Cohort 2)
Supplementary Table 4. Clinical and pathologic characteristics of Cohort 2
				stage
ID	Age (years)	Sex	location	T	N	M	differentiation	size (cm)	# lymph nodes positive	total # lymphnodes	location metachronous metasis
C2-1	55	M	stomach	4	3	1	MD	7.5	7	12	NA
C2-2	61	M	dist stomach	2	3	x	PD	4.7	15	31	NA
C2-3	75	F	stomach	4	2	x	MD,PD	6.3	6	25	NA
C2-4	85	F	stomach	3	3	x	PD	3.9	5	8	NA
C2-5	58.7781	M	distal esophagus	3	3	x	PD	12.5	8	11	NA
C2-6	65.4575	M	GEJ	3	1	x	MD,PD	4	2	2	NA
C2-7	65.3397	M	GEJ	3	3	x	MD	4.7	8	12	NA
C2-8	65.4575	M	GEJ	3	1	x	MD,PD	4	2	2	NA
C2-9	71.2548	M	distal esophagus	3	1	x	MD,PD	5.5	2	10	NA
C2-10	82.3	M	GEJ	2	2	x	MD	2.3	5	19	NA
C2-11	73.8082	M	distal esophagus	2	2	x	PD	7.4	5	11	NA
C2-12	64.7945	M	distal esophagus	3	2	x	PD	2.3	3	25	NA
C2-13	72.3397	M	distal esophagus	3	1	x	PD	4.5	2	15	NA
C2-14	42.337	M	cardia/GEJ	2	1	x	PD	4.5	2	7	NA
C2-15	72	M	GEJ	3	3	x	PD	4	11	11	NA
C2-16	87.0959	F	GEJ	2	2	x	PD	1.5	4	30	NA
C2-17	41.6959	F	GEJ	3	1a	0	PD	3	2	18	chest wall
C2-18	43	F	stomach	3	2	x	PD	6.5	12	20	NA
C2-19	77	F	stomach	2	0	x	PD	12	0	8	peritoneum
C2-20	62.263	M	GEJ	3	1c	0	MD	3	10	21	anastomosis
C2-21	79.6466	F	GEJ	3	1	x	MD	2.5	2	5	peritoneum
C2-22	59	M	DISTAL/GEJ	3	0	x	MD	8.6	0	10	lung
C2-23	55.3945	M	GEJ	3	2	x	MD	3	3	22	mediastinum
C2-24	57.8329	M	GEJ	3	1	0	MD	3.5	3	39	paratracheal mass
C2-25	65.9288	M	GEJ	3	1	0	MD	4	2	44	lung, chest wall
C2-26	65.9288	M	GEJ	3	2	0	MD	3.4	5	28	bile duct, liver
Abbreviations:
GEJ: gastroesophageal junction, MD: moderately differentiated, PD: poorly differentiated, NA: not applicable

## Sheet: Suppl Table 5 (Cohort 2)
Supplementary Table 5. Complete sequencing results of Cohort 2
	C2-1						C2-2							C2-3								C2-4								C2-5								C2-6						C2-7
AKT1
ALK
ALPK2
APC
APC
AR
ARHGAP
ARHGAP26
ARGHAP6
ARID1A
ARID1B
ARID2A
ATM
BCL2
BCL9
BCL2L1
BCOR
BIRC5
BRAF
BRCA1
BRCA2
BRD4
CA9
CACNA2D3
CASP3
CASZ1
CCND1
CCND2
CCND3
CCNE1
CCSER1
CDH1
CDK1
CDK2
CDK12
CDK4
CDK6
CDK8
CDK9
CDKN1A
CDKN2A
CDKN2B
CHL1
CIC
CRIP1
CSMD1
CTNNA1
CTNNA3
CTNNB1
CTSB
DOCK2
E2F3
EGFR
ELF3
ELMO1
EP300
EPHB3
EPHB6
ERBB2
ERBB2IP
ERBB3
ERBB4
FAM190A
FAT1
FAT2
FAT3
FAT4
FBXW7
FGF19
FGF3
FGF3
FGF4
FGFR1
FGFR4
FHIT
FRS2
GAB1
GATA4
GATA6
GLI3
GNAS
HES1
HLA-A
HLA-B
IDH1
IGF2BP3
IGFR1
IL8
ING5
IRF2
JAK2
KDM6A
KEAP1
KEAP1
KMT2C
KMT2D
KRAS
LRP1B
LRP6
MACF1
MAGI3
MAP2K2
MAP2K4
MAP3K1
MAP3K9
MAPK3
MDM2
MECOM
MET
MTOR
MSH2
MUTYH
MYB
MYC
NEGR1
NEIL2
NF1
NKX2-1
NOTCH1
NOTCH2
NOTCH4
NRAS
PALB2
PARD3B
PBRM1
PCGF6
PDE4D
PDGFRB
PGM5
PIK3CA
PIK3CG
PIK3R1
POLB
POU5F1B
PREX2
PRKCI
PTPN23
PTCH1
PTCH2
PTEN
PTPRD
RASA1
RBPJ
RHOA
RNF43
RUNX1
RUNX1T1
RUNX3
SMAD2
SMAD4
SMARCA4
SMARCA5
SMURF1
SOHLH2
SOX2
SOX9
SRC
STAT3
STAT6
STK11
SYNE1
TERC
TERT
TGFBR2
TLN1
TP53
TP63
TRAF2
TSC1
TSC2
VPS13A
WT1
YAP1
ZNF217
[truncated: 19 more columns]

## Sheet: Suppl Table 6 (Cohort 3)
Supplementary Table 6. Clinical characteristics of Cohort 3
Case ID	Location	Blood collection date	Procedure date	Location of sample	Gender	Age	Biopsy Tumor %	Plasma DNA Tumor %
C3-1	Esophageal	2012-11-27 16:07:00	2012-11-19	Primary	M	58	75	13
C3-2	Esophageal	2013-08-27 16:08:00	2013-08-13	Primary	M	59	25	11
C3-3	Esophageal	2015-01-07 09:23:00	2014-12-15	Primary	M	72	55	25
C3-4	Esophageal	2015-05-18 14:23:00	2015-04-23	Primary	M	63	30	13
C3-5	Esophageal	2015-07-06 17:35:00	2015-07-14	Primary	M	84	60	10
C3-6	Esophageal	2015-08-04 14:41:00	2015-07-20	Primary	M	67	30	37
C3-7	GEJ	2016-01-05 12:51:00	2015-12-10	Primary	M	56	60	27
C3-8	Gastric	2013-08-21 17:13:00	2013-08-26	Gastric lymph node	F	36	30	19
C3-9	GEJ/Gastric	2014-09-09 12:23:00	2014-08-26	Primary	M	36	20	29
C3-10	Esophageal	2011-09-06	2011-08-30	Primary	M	69	70	43
C3-11	GEJ	2012-11-27 17:58:00	2012-11-08	Primary	F	58	40	17
Abbreviations:
GEJ: gastroesophageal junction

## Sheet: Suppl Table 7 (PANGEA Cohort)
Supplementary Table 7. Treatment assignment algorithm of PANGEA clinical trial

## Sheet: Suppl Table 8  (PANGEA Cohort)
Supplementary Table 8. Clinical Characteristics and Response Data of evaluable patients in the PANGEA cohort (N = 21)
Characteristic	No (%)
Age, years
Mean/SD	62/11.68
Median	64
Sex
Female	2 (10)
Male	19 (90)
Primary Site
Stomach	6 (29)
Esophagogastric Junction	15 (71)
ECOG Performance Status
0	8 (38)
1	9 (43)
2	4 (19)
Prior surgery
Yes	3 (14)
No	18 (86)
Prior neoadjuvant/adjuvant chemotherapy
Yes	3 (14)
No	18 (86)
Molecular Arm Assignment
HER2	8 (38)
MET	2 (10)
FGFR2	3 (14)
EGFR	3 (14)
*EGFR++	2 (10)
*EGFR+	1 (5)
VEGFR2	4 (19)
**VEGFR2++	3 (14)
**VEGFR2+	1 (5)
MSI-H	1 (5)
Metastatic Disease Site
Liver	7 (33)
Lung	3 (14)
Peritoneum	8 (38)
Bone	3 (14)
M1 lymph nodes	11 (52)
Baseline Molecular Heterogeneity Between Primary and Metastasis or cfDNA Leading to Change in Treatment Assignment	7 (33)
Median follow up, months	10
* EGFR++: EGFR amplified; EGFR+: 'all-negative, EGFR expressing by mass spectrometry'
** VEGFR2++: KRAS/PIK3CA aberrations; VEGFR2+: 'all-negative'
